# Supplementary material
Source: publisher site journal article supplement (https://www.dovepress.com/article/152579)
Supplement: Supplementary file 1 [file get_supplementary_file.php]

**Supplemental materials**

**Table S1** Change in score for each ACTS question

| **Questions** | **Scores** | | |
| --- | --- | --- | --- |
| ***ACTS burdens*** | **At baseline** | **At Week 12** | **Change in score** |
| Question 1.Bleeding/vigorous activities | 4.3 (4.3–4.4) | 4.6 (4.5–4.7) | 0.3 (0.2–0.3) |
| Question 2. Bleeding/usual activities | 4.3 (4.3–4.4) | 4.6 (4.6–4.7) | 0.3 (0.2–0.4) |
| Question 3. Bruising | 4.1 (4.0–4.2) | 4.5 (4.5–4.6) | 0.4 (0.3–0.5) |
| Question 4. Avoid other medicines | 4.6 (4.5–4.6) | 4.8 (4.8–4.9) | 0.3 (0.2–0.3) |
| Question 5.Limit eat/drink | 3.3 (3.2–3.4) | 4.7 (4.7–4.8) | 1.4 (1.3–1.5) |
| Question 6. Hassle/daily | 4.0 (3.9–4.1) | 4.6 (4.5–4.6) | 0.6 (0.5–0.7) |
| Question 7. Hassle/Occasional | 4.0 (3.9–4.1) | 4.7 (4.6–4.7) | 0.7 (0.6–0.7) |
| Question 8. Difficult to follow your anticoagulation treatment | 4.3 (4.2–4.3) | 4.7 (4.7–4.7) | 0.4 (0.4–0.5) |
| Question 9. Time-consuming anticoagulation treatment | 4.3 (4.2–4.4) | 4.7 (4.7–4.7) | 0.4 (0.3–0.5) |
| Question 10. Worry about anticoagulation treatment | 4.1 (4.0–4.2) | 4.5 (4.5–4.6) | 0.4 (0.3–0.5) |
| Question 11. Frustrating anticoagulation treatment | 4.2 (4.1–4.3) | 4.6 (4.6–4.7) | 0.4 (0.4–0.5) |
| Question 12.Burden of ACT | 4.2 (4.1–4.3) | 4.6 (4.5–4.6) | 0.4 (0.3–0.4) |
| Question 13. Overall negative impact of anticoagulation treatment | 4.2 (4.1–4.3) | 4.7 (4.6–4.7) | 0.5 (0.4–0.6) |
|  |  |  |  |
| ***ACTS benefits*** |  |  |  |
| Question 14. Confident in anticoagulation treatment | 3.5 (3.4–3.6) | 3.4 (3.3–3.5) | −0.1 (−0.2 to 0.0) |
| Question 15. Reassured by anticoagulation treatment | 3.6 (3.6–3.7) | 3.5 (3.4–3.6) | −0.1 (−0.2 to 0.0) |
| Question 16 Satisfied with anticoagulation treatment | 3.4 (3.3–3.5) | 3.5 (3.4–3.6) | 0.1 (0.0–0.2) |
| Question 17. Overall positive impact of anticoagulation treatment | 2.9 (2.9–3.0) | 3.1 (3.1–3.2) | 0.2 (0.1–0.3) |

**Abbreviations:** ACTS, Anti-Clot Treatment Scale

Only summarized questions were shown in this table because of the copyright of ACTS. The official full version of ACTS questionnaire is shown in an article by Cano et al. (2012) (“The Anti-Clot Treatment Scale (ACTS) in clinical trials: cross-cultural validation in venous thromboembolism patients.” Cano SJ, Lamping DL, Bamber L, Smith S. Health Qual Life Outcomes. 2012;10:120. <http://www.hqlo.com/content/10/1/120>)

**Table S2** Patient characteristics of ACTS benefit “improvers” and “non-improvers”

|  | Whole FAS | Improvers | Non-improvers | *P*-value |
| --- | --- | --- | --- | --- |
| N (%) | 697 | 293 (42.2%) | 401 (57.8%) |  |
| Male | 433 (62.1%) | 315 (60.7%) | 118 (66.3%) | 0.0476 |
| Age (years) | 76.2±9.1 | 76.1±10.0 | 76.2±8.5 | 0.5832 |
| <65 | 71 (10.2%) | 38 (13.0%) | 33 (8.2%) | 0.1564 |
| 65–69 | 80 (11.5%) | 31 (10.6%) | 49 (12.2%) |  |
| 70–74 | 107 (15.4%) | 36 (12.3%) | 71 (17.7%) |  |
| 75–79 | 160 (23.0%) | 67 (22.9%) | 92 (22.9%) |  |
| 80–84 | 157 (22.5%) | 65 (22.2%) | 90 (22.4%) |  |
| ≥85 | 122 (17.5%) | 56 (19.1%) | 66 (16.5%) |  |
| Body weight (kg) | 60.6±12.6 | 60.4±13.4 | 60.9±11.9 | 0.4080 |
| Creatinine clearance (mL/min) | 60.8±43.0 | 60.5±56.7 | 61.2±23.0 | 0.0199 |
| FIR | 60.2±30.4 | 60.9±33.0 | 59.7±28.6 | 0.2312 |
| <20% | 85 (12.2%) | 44 (15.0%) | 41 (10.2%) | 0.0142 |
| 20%–39% | 70 (10.0%) | 21 (7.2%) | 49 (12.2%) |  |
| 40%–59% | 144 (20.7%) | 52 (17.7%) | 90 (22.4%) |  |
| 60%–79% | 146 (20.9%) | 55 (18.8%) | 91 (22.7%) |  |
| ≥80% | 227 (32.6%) | 106 (36.2%) | 120 (29.9%) |  |
| Concomitant medications | 5.5±3.3 | 5.6±3.3 | 5.5±3.2 | 0.7964 |
| 0–2 | 127 (18.2%) | 51 (17.4%) | 75 (18.7%) | 0.5881 |
| 3–4 | 150 (21.5%) | 59 (20.1%) | 91 (22.7%) |  |
| 5–6 | 171 (24.5%) | 81 (27.6%) | 90 (22.4%) |  |
| 7–8 | 132 (18.9%) | 56 (19.1%) | 75 (18.7%) |  |
| ≥9 | 117 (16.8%) | 46 (15.7%) | 70 (17.5%) |  |
| Duration of AF (years) | 7.3±5.4 | 6.9±5.4 | 7.6±5.4 | 0.0373 |
| Duration of warfarin therapy (years) | 6.1±4.2 | 5.7±4.1 | 6.4±4.2 | 0.0347 |
| CHA2DS2-VASc score | 4.0±1.7 | 4.2±1.8 | 3.9±1.6 | 0.0216 |
| <2 | 44 (6.3%) | 19 (6.5%) | 25 (6.2%) | 0.2410 |
| 2 | 87 (12.5%) | 32 (10.9%) | 55 (13.7%) |  |
| 3 | 139 (19.9%) | 49 (16.7%) | 90 (22.4%) |  |
| 4 | 172 (24.7%) | 73 (24.9%) | 98 (24.4%) |  |
| 5 | 120 (17.2%) | 56 (19.1%) | 64 (16.0%) |  |
| ≥6 | 135 (19.4%) | 64 (21.8%) | 69 (17.2%) |  |
| CHADS2 score | 2.5±1.3 | 2.6±1.4 | 2.4±1.3 | 0.0331 |
| <2 | 167 (24.0%) | 65 (22.2%) | 102 (25.4%) | 0.0939 |
| 2 | 204 (29.3%) | 75 (25.6%) | 128 (31.9%) |  |
| 3 | 168 (24.1%) | 80 (27.3%) | 88 (21.9%) |  |
| ≥4 | 158 (22.7%) | 73 (24.9%) | 83 (20.7%) |  |
| HAS-BLED score | 2.6±1.1 | 2.5±1.0 | 2.7±1.1 | 0.0227 |
| <1 | 95 (13.6%) | 39 (13.3%) | 56 (14.0%) | 0.0353 |
| 2 | 258 (37.0%) | 124 (42.3%) | 132 (32.9%) |  |
| 3 | 212 (30.4%) | 88 (30.0%) | 124 (30.9%) |  |
| 4 | 101 (14.5%) | 34 (11.6%) | 66 (16.5%) |  |
| ≥5 | 31 (4.4%) | 8 (2.7%) | 23 (5.7%) |  |
| Patient understanding of warfarin therapy |  |  |  |  |
| Importance of therapy |  |  |  |  |
| Very high | 242 (34.7%) | 83 (28.3%) | 158 (39.4%) | 0.0043 |
| High | 422 (60.5%) | 193 (65.9%) | 228 (56.9%) |  |
| Low | 31 (4.4%) | 17 (5.8%) | 13 (3.2%) |  |
| Very low | 2 (0.3%) | 0 (0.0%) | 2 (0.5%) |  |
| Risk of therapy |  |  |  |  |
| Very high | 229 (32.9%) | 92 (31.4%) | 136 (33.9%) | 0.2183 |
| High | 424 (60.8%) | 179 (61.1%) | 243 (60.6%) |  |
| Low | 41 (5.9%) | 19 (6.5%) | 22 (5.5%) |  |
| Very low | 3 (0.4%) | 3 (1.0%) | 0 (0.0%) |  |
| Reasons for changing from warfarin to apixaban |  |  |  |  |
| Physician perspective |  |  |  |  |
| Unstable PT-INR | 258 (37.0%) | 104 (35.5%) | 154 (38.4%) | 0.4743 |
| Adverse event with warfarin | 43 (6.2%) | 24 (8.2%) | 19 (4.7%) | 0.0788 |
| Drug interaction with other medications | 49 (7.0%) | 23 (7.8%) | 24 (6.0%) | 0.3608 |
| Inconvenience of regular PT-INR monitoring | 281 (40.3%) | 131 (44.7%) | 150 (37.4%) | 0.0602 |
| Concerns about high bleeding risk with warfarin | 176 (25.3%) | 90 (30.7%) | 84 (20.9%) | 0.0045 |
| Warfarin bleeding risk | 47 (6.7%) | 25 (8.5%) | 22 (5.5%) | 0.1272 |
| At the timing of ablation | 7 (1.0%) | 2 (0.7%) | 5 (1.2%) | 0.7049 |
| Other medical reasons | 10 (1.4%) | 2 (0.7%) | 8 (2.0%) | 0.2040 |
| Patient perspective |  |  |  |  |
| Inconvenience of regular PT-INR monitoring | 136 (19.5%) | 58 (19.8%) | 77 (19.2%) | 0.8467 |
| Dietary restriction | 238 (34.1%) | 108 (36.9%) | 130 (32.4%) | 0.2259 |
| Concerns about high bleeding risk with warfarin | 21 (3.0%) | 7 (2.4%) | 14 (3.5%) | 0.5034 |
| Good reputation of apixaban | 122 (17.5%) | 62 (21.2%) | 60 (15.0%) | 0.0432 |
| Recommendation from family or acquaintance | 22 (3.2%) | 7 (2.4%) | 15 (3.7%) | 0.3839 |
| Others | 15 (2.2%) | 8 (2.7%) | 7 (1.7%) | 0.4334 |
| Income other than pension | 196 (28.1%) | 69 (23.5%) | 127 (31.7%) | 0.0169 |
| Self-pay portion of total medical costs |  |  |  |  |
| 0% | 104 (14.9%) | 42 (14.3%) | 61 (15.2%) |  |
| 10% | 411 (59.0%) | 174 (59.4%) | 235 (58.6%) |  |
| 20% | 42 (6.0%) | 16 (5.5%) | 26 (6.5%) | 0.9505 |
| 30% | 139 (19.9%) | 61 (20.8%) | 78 (19.5%) |  |
| 100% | 1 (0.1%) | 0 (0.0%) | 1 (0.2%) |  |
| Doses of apixaban |  |  |  |  |
| 2.5 mg BID | 328 (47.1%) | 152 (51.9%) | 174 (43.4%) |  |
| 5 mg BID | 363 (52.1%) | 138 (47.1%) | 224 (55.9%) | 0.0574 |
| Other | 6 (0.9%) | 3 (1.0%) | 3 (0.7%) |  |
| Concomitant diseases |  |  |  |  |
| Bleeding history | 75 (10.8%) | 22 (7.5%) | 53 (13.2%) | 0.0185 |
| Hypertension | 550 (78.9%) | 231 (78.8%) | 316 (78.8%) | 1.0000 |
| Diabetes | 192 (27.5%) | 84 (28.7%) | 106 (26.4%) | 0.5466 |
| Heart failure | 276 (39.6%) | 122 (41.6%) | 153 (38.2%) | 0.3875 |
| Myocardial infarctiona | 153 (22.0%) | 71 (24.2%) | 80 (20.0%) | 0.1926 |
| Strokeb | 150 (21.5%) | 75 (25.6%) | 74 (18.5%) | 0.0250 |
| Renal dysfunction | 20 (2.9%) | 7 (2.4%) | 13 (3.2%) | 0.6475 |
| Hepatic dysfunction | 25 (3.6%) | 12 (4.1%) | 13 (3.2%) | 0.5450 |
| Labile PT-INR | 245 (35.2%) | 96 (32.8%) | 148 (36.9%) | 0.2614 |
| Use of antiplatelet drugs and/or NSAIDs | 144 (20.7%) | 51 (17.4%) | 93 (23.2%) | 0.0717 |

**Notes:** Data are shown as N (%) or mean±SD. “Improver” refers to patients whose ACTS benefit score was improved after switching to apixaban. “Non-improver” refers to patients whose benefit score was unchanged or worsened after switching to apixaban. *P*-values were calculated using the Wilcoxon rank sum test or Fisher’s exact test.

aIncludes myocardial infarction, peripheral arterial disease, and plaque.

bIncludes stroke, TIA, and embolism.

**Abbreviations:** ACTS, Anti-Clot Treatment Scale; AF, atrial fibrillation; BID, twice daily; FAS, full analysis set; FIR, frequency in range; NSAID, nonsteroidal anti-inflammatory drug; PT-INR, prothrombin time/international normalized ratio; SD, standard deviation; TIA, transient ischemic attack.

**Table S3** Impact of patient understanding of risks and benefits of anticoagulant therapy on improvement of ACTS burden scores

|  | Importance of therapy | | |  | Risk of therapy | | |  |
| --- | --- | --- | --- | --- | --- | --- | --- | --- |
|  | OR | 95% CI | *P*-value |  | OR | 95% CI | *P*-value |  |
| Male | 0.90 | 0.58–1.38 | 0.6222 |  | 0.89 | 0.58–1.37 | 0.5865 |  |
| Age ≥70 years | 1.88 | 1.13–3.13 | 0.0159 |  | 1.88 | 1.13–3.14 | 0.0153 |  |
| ACTS score at baseline | 0.79 | 0.75–0.82 | <0.0001 |  | 0.79 | 0.75–0.82 | <0.0001 |  |
| History of strokea | 1.58 | 0.90–2.80 | 0.1141 |  | 1.64 | 0.93–2.90 | 0.0875 |  |
| Use of antiplatelet drugs and/or NSAIDs | 0.60 | 0.36–1.00 | 0.0511 |  | 0.59 | 0.36–0.99 | 0.0477 |  |
| Level of understanding of benefits and risks of anticoagulant therapy |  |  |  |  |  |  |  |  |
| Very high | 1.09 | 0.71–1.67 | 0.7048 |  | 0.93 | 0.60–1.44 | 0.7368 |  |
| High | 1.00 |  |  |  | 1.00 |  |  |  |
| Low/very low | 1.47 | 0.54–4.04 | 0.4507 |  | 0.65 | 0.29–1.45 | 0.2914 |  |

**Notes:** Levels of understanding of benefits and risks of anticoagulant therapy were added to the base model.

aIncludes stroke, TIA, and embolism.

**Abbreviations:** ACTS, Anti-Clot Treatment Scale; CI, confidence interval; NSAID, nonsteroidal anti-inflammatory drugs; OR, odds ratio; TIA, transient ischemic attack.

**Table S4** Impact of socioeconomic status and patient/physician perspectives on improvement of ACTS burden scores

|  | Patient perspective | | |  | Socioeconomic status | | |  | Physician perspective | | |
| --- | --- | --- | --- | --- | --- | --- | --- | --- | --- | --- | --- |
|  | OR | 95% CI | *P*-value |  | OR | 95% CI | *P*-value |  | OR | 95% CI | *P*-value |
| Male | 0.89 | 0.57–1.37 | 0.5828 |  | 0.83 | 0.53–1.30 | 0.4164 |  | 0.88 | 0.57–1.36 | 0.5734 |
| Age ≥70 years | 1.82 | 1.09–3.04 | 0.0230 |  | 2.55 | 1.28–5.10 | 0.0079 |  | 1.85 | 1.11–3.08 | 0.0189 |
| ACTS score at baseline | 0.79 | 0.75–0.83 | <0.0001 |  | 0.79 | 0.75–0.83 | <0.0001 |  | 0.79 | 0.75–0.83 | <0.0001 |
| History of strokea | 1.62 | 0.92–2.86 | 0.0967 |  | 1.65 | 0.93–2.92 | 0.0874 |  | 1.66 | 0.93–2.96 | 0.0835 |
| Use of antiplatelet drugs and/or NSAIDs | 0.61 | 0.36–1.02 | 0.0578 |  | 0.59 | 0.35–1.00 | 0.0479 |  | 0.62 | 0.37–1.03 | 0.0673 |
| Burden of repetitive PT-INR measurements | 0.92 | 0.55–1.53 | 0.7517 |  |  |  |  |  |  |  |  |
| Dietary restrictions | 1.29 | 0.82–2.01 | 0.2736 |  |  |  |  |  |  |  |  |
| Good reputation of apixaban | 0.82 | 0.49–1.38 | 0.4527 |  |  |  |  |  |  |  |  |
| Income other than pension |  |  |  |  | 1.05 | 0.65–1.69 | 0.8388 |  |  |  |  |
| Self-pay ratio: 0% |  |  |  |  | 0.62 | 0.30–1.29 | 0.2002 |  |  |  |  |
| Self-pay ratio: 10% |  |  |  |  | 0.61 | 0.32–1.18 | 0.1432 |  |  |  |  |
| Self-pay ratio: >20% |  |  |  |  | 1.00 |  |  |  |  |  |  |
| Labile PT-INR |  |  |  |  |  |  |  |  | 1.04 | 0.66–1.64 | 0.8502 |
| No need for repetitive PT-INR measurements |  |  |  |  |  |  |  |  | 0.68 | 0.44–1.06 | 0.0876 |
| Risk of bleeding |  |  |  |  |  |  |  |  | 0.96 | 0.58–1.61 | 0.8833 |

**Notes:** Several factors were added to the base model.

aIncludes stroke, TIA, and embolism.

**Abbreviations:** ACTS, Anti-Clot Treatment Scale; CI, confidence interval; NSAID, nonsteroidal anti-inflammatory drug; OR, odds ratio; PT-INR, prothrombin time/international normalized ratio; TIA, transient ischemic attack.

**Table S5** Impact of FIR/CHADS2/CHA2DS2-VASc/HAS-BLED scores on improvement of ACTS burden scores

|  | FIR | | |  | CHADS2 | | |  | CHA2DS2-VASc | | |  | HAS-BLED | | |
| --- | --- | --- | --- | --- | --- | --- | --- | --- | --- | --- | --- | --- | --- | --- | --- |
|  | OR | 95% CI | *P*-value |  | OR | 95% CI | *P*-value |  | OR | 95% CI | *P*-value |  | OR | 95% CI | *P*-value |
| Male | 0.93 | 0.59–1.46 | 0.7528 |  | 0.86 | 0.54–1.37 | 0.5237 |  | 0.87 | 0.55–1.40 | 0.5738 |  | 0.92 | 0.60–1.41 | 0.6934 |
| Age ≥70 years | 2.31 | 1.29–4.12 | 0.0048 |  | 1.83 | 1.06–3.18 | 0.0304 |  | 1.82 | 1.01–3.27 | 0.0473 |  | 1.72 | 1.01–2.92 | 0.0458 |
| ACTS score at baseline | 0.79 | 0.76–0.83 | <0.0001 |  | 0.79 | 0.75–0.82 | <0.0001 |  | 0.79 | 0.75–0.82 | <0.0001 |  | 0.79 | 0.75–0.82 | <0.0001 |
| History of strokea | 1.42 | 0.79–2.57 | 0.2413 |  | 2.06 | 1.02–4.14 | 0.0431 |  | 2.01 | 0.96–4.21 | 0.0626 |  | 1.71 | 0.94–3.10 | 0.0801 |
| Use of antiplatelet drugs and/or NSAIDs | 0.60 | 0.35–1.03 | 0.0651 |  | 0.58 | 0.35–0.98 | 0.0421 |  | 0.61 | 0.36–1.04 | 0.0687 |  | 0.67 | 0.36–1.22 | 0.1875 |
| FIR <40% | 1.46 | 0.83–2.58 | 0.1871 |  |  |  |  |  |  |  |  |  |  |  |  |
| FIR ≥40% | 1.00 |  |  |  |  |  |  |  |  |  |  |  |  |  |  |
| Score 0, 1 |  |  |  |  | 1.18 | 0.68–2.03 | 0.5559 |  | 1.15 | 0.44–3.00 | 0.7819 |  | 1.00 |  |  |
| 2 |  |  |  |  | 1.00 |  |  |  | 1.00 |  |  |  | 1.68 | 0.89–3.17 | 0.1119 |
| 3 |  |  |  |  | 2.03 | 1.12–3.69 | 0.0196 |  | 1.35 | 0.68–2.68 | 0.3966 |  | 1.51 | 0.77–2.98 | 0.2307 |
| 4 |  |  |  |  | 0.88 | 0.39–1.98 | 0.7545 |  | 1.18 | 0.58–2.40 | 0.6392 |  | 1.12 | 0.47–2.64 | 0.7978 |
| 5 |  |  |  |  | 0.89 | 0.44–1.80 | 0.7435 |  | 1.39 | 0.62–3.15 | 0.4246 |  |
| ≥6 |  |  |  |  |  | 0.79 | 0.30–2.08 | 0.6277 |  |

**Notes:** Several factors were added to the base model.

aIncludes stroke, TIA, and embolism.

**Abbreviations:** ACTS, Anti-Clot Treatment Scale; CI, confidence interval; FIR, frequency in range; NSAID, nonsteroidal anti-inflammatory drug; OR, odds ratio; TIA, transient ischemic attack.

**Table S6** Logistic regression analysis to identify factors associated with improvement of ACTS benefit scores

|  | Model 1 | | |  | Model 2 | | |  | Model 3 (base model) | | |
| --- | --- | --- | --- | --- | --- | --- | --- | --- | --- | --- | --- |
|  | OR | 95% CI | *P*-value |  | OR | 95% CI | *P*-value |  | OR | 95% CI | *P*-value |
| Male | 0.67 | 0.47–0.96 | 0.0310 |  | 0.72 | 0.50–1.04 | 0.0761 |  | 0.71 | 0.05–1.03 | 0.0705 |
| Age <70 years | 1.00 |  |  |  | 1.00 |  |  |  | 1.00 |  |  |
| Age 70–79 years | 0.65 | 0.42–1.02 | 0.0628 |  | 0.61 | 0.39–0.97 | 0.0356 |  | 0.63 | 0.41–0.96 | 0.0333 |
| Age ≥80 years | 0.85 | 0.54–1.35 | 0.4985 |  | 0.65 | 0.38–1.10 | 0.1079 |  |
| ACTS score at baseline | 0.73 | 0.68–0.78 | <0.0001 |  | 0.73 | 0.68–0.78 | <0.0001 |  | 0.73 | 0.68–0.78 | <0.0001 |
| History of bleeding | 0.51 | 0.28–0.90 | 0.0207 |  | 0.51 | 0.29–0.91 | 0.0232 |  | 0.51 | 0.29–0.91 | 0.0237 |
| History of strokea | 1.55 | 1.03–2.33 | 0.0367 |  | 1.50 | 0.99–2.26 | 0.0545 |  | 1.50 | 0.99–2.26 | 0.0534 |
| Myocardial infarctionb | 1.72 | 1.13–2.60 | 0.0110 |  | 1.71 | 1.13–2.60 | 0.0117 |  | 1.71 | 1.13–2.60 | 0.0114 |
| Use of antiplatelet drugs and/or NSAIDs | 0.58 | 0.38–0.91 | 0.0169 |  | 0.57 | 0.36–0.89 | 0.0126 |  | 0.56 | 0.36–0.88 | 0.0115 |
| Apixaban 5 mg BID |  |  |  |  | 1.56 | 1.03–2.37 | 0.0358 |  | 1.60 | 1.10–2.32 | 0.0134 |

**Notes:** Model 1 was adjusted for gender, age, ACTS score at baseline, history of bleeding, and history of stroke (only “robust” factors included). Model 2 was adjusted for factors in Model 1 + complicated diseases (hypertension, diabetes, and myocardial infarction), concomitant drugs (antiplatelet drugs and NSAIDs), and INR control status. Model 3 (base model) was adjusted for age and factors with *P*<0.2 in Model 1 or Model 2.

aIncludes stroke, TIA, and embolism.

bIncludes myocardial infarction, peripheral arterial disease, and plaque.

**Abbreviations:** ACTS, Anti-Clot Treatment Scale; BID, twice daily; CI, confidence interval; INR, international normalized ratio; NSAIDs, nonsteroidal anti-inflammatory drugs; OR, odds ratio; TIA, transient ischemic attack.

**Table S7 Study sites recruiting at least one patient and ethical committees that approved the study**

| **Site** | **Ethical committee** |
| --- | --- |
| Abashiri-Kosei General Hospital | Institutional Clinical Trial Ethical Committee |
| Aishin Cardiovascular Clinic | Adachi Kyosai Hospital Ethical Committee* |
| Aishin Clinic | Adachi Kyosai Hospital Ethical Committee* |
| Akita City Hospital | Akita City Hospital Ethical Committee |
| Anno Cardiology Clinic | Adachi Kyosai Hospital Ethical Committee* |
| Azumi Clinic | Adachi Kyosai Hospital Ethical Committee* |
| Baba Clinic | Adachi Kyosai Hospital Ethical Committee* |
| Cardiovascular Hospital of Central Japan | Adachi Kyosai Hospital Ethical Committee* |
| Chikamori Hospital | Chikamori Hospital Ethical Committee |
| Clinic Hiroto | Adachi Kyosai Hospital Ethical Committee* |
| Dokkyo Medical University Nikko Medical Center | Institutional Bioethical Committee |
| Fukagawa Gatharia Clinic | Adachi Kyosai Hospital Ethical Committee* |
| Fukui Cardiovascular Center | Fukui Cardiovascular Center Hospital Clinical Trial Ethical Committee |
| Fukuoka Tokushukai Medical Center | Institutional Ethical Committee |
| Fukuoka Wajiro Hospital | Fukuoka Wajiro Hospital Ethical Committee |
| Funamoto Clinic | Adachi Kyosai Hospital Ethical Committee* |
| Gunmaken Saiseikai Maebashi Hospital | Institutional Ethical Committee |
| Hachioji Naika Clinic | Adachi Kyosai Hospital Ethical Committee* |
| Hasegawa Outpatients Clinic for Cardiovascular Disease | Adachi Kyosai Hospital Ethical Committee* |
| Hayashi Clinic | Adachi Kyosai Hospital Ethical Committee* |
| Hiki Clinic | Adachi Kyosai Hospital Ethical Committee* |
| Hirokane Naika & Heart Clinic | Adachi Kyosai Hospital Ethical Committee* |
| Hirasawa Cardiovascular Clinic | Adachi Kyosai Hospital Ethical Committee* |
| Hiroshi Yamaguchi Clinic | Adachi Kyosai Hospital Ethical Committee* |
| Hisatomi Naika Clinic | Adachi Kyosai Hospital Ethical Committee* |
| Hokkaido P.W.F.A.C. Obihiro-Kosei General Hospital | Hospital Ethical Committee |
| Honjo Daiichi Hospital | Honjo Daiichi Hospital Ethical Committee |
| Ichiki Clinic | Adachi Kyosai Hospital Ethical Committee* |
| Inoue Cardiovascular Clinic | Adachi Kyosai Hospital Ethical Committee* |
| Imamura General Hospital | Imamura General Hospital Ethical Committee |
| Iwate Medical University | Iwate Medical University Hospital Ethical Committee |
| Iwatsuki Minami Hospital | Adachi Kyosai Hospital Ethical Committee* |
| Iwaya Clinic | Adachi Kyosai Hospital Ethical Committee* |
| JA Hiroshima General Hospital | Institutional Ethical Committee |
| Kagoshima Kouseiren Hospital | Hospital Ethical Committee |
| Kamakura Yukinoshita Clinic | Adachi Kyosai Hospital Ethical Committee* |
| Kamata Clinic | Adachi Kyosai Hospital Ethical Committee* |
| Kanazawa Medical Center | Hospital Medical Committee |
| Kawahara Medical Clinic | Adachi Kyosai Hospital Ethical Committee* |
| Kimitsu Chuo Hospital | Kimitsu Chuo Hospital Ethical Committee |
| Kinugawa Cardiology Clinic | Adachi Kyosai Hospital Ethical Committee* |
| Kitasato University School of Medicine | Kitasato University Hospital Ethical Committee |
| Kurashiki Central Hospital | Kurashiki Central Hospital Clinical Research Ethical Committee |
| Kushikino Naika・Junkankika | Adachi Kyosai Hospital Ethical Committee* |
| Kurume University Hospital | Kurume University Hospital Ethical Committee |
| Machii Heart Clinic | Adachi Kyosai Hospital Ethical Committee* |
| Matsushita Naika Clinic | Adachi Kyosai Hospital Ethical Committee* |
| Minamino Cardiovascular Hospital | Adachi Kyosai Hospital Ethical Committee* |
| Mineki Naika Clinic | Adachi Kyosai Hospital Ethical Committee* |
| Miyanomori Memorial Hospital | Adachi Kyosai Hospital Ethical Committee* |
| Miyanosawa Cardiovascular Clinic | Adachi Kyosai Hospital Ethical Committee* |
| Murakami Clinic | Adachi Kyosai Hospital Ethical Committee*) |
| Nakadai Clinic | Adachi Kyosai Hospital Ethical Committee* |
| Nakanishi Clinic | Adachi Kyosai Hospital Ethical Committee* |
| Nakayama Clinic | Adachi Kyosai Hospital Ethical Committee* |
| Nakamura Cardiovascular Clinic | Adachi Kyosai Hospital Ethical Committee* |
| Nijigaoka Hospital | Adachi Kyosai Hospital Ethical Committee* |
| Nishiarai Heart Center Hospital | Adachi Kyosai Hospital Ethical Committee* |
| Ogaki Municipal Hospital | Hospital Clinical Research Ethical Committee |
| Ohara Medical Center | Ohara Medical Center Hospital Ethical Committee |
| Okuda Naika Clinic | Adachi Kyosai Hospital Ethical Committee* |
| Osaka Police Hospital | Hospital Ethical Committee |
| Ota Clinic | Adachi Kyosai Hospital Ethical Committee* |
| Owari Clinic | Adachi Kyosai Hospital Ethical Committee* |
| Takai Clinic | Adachi Kyosai Hospital Ethical Committee* |
| Research Institute for Brain and Blood Vessels-Akita | Hospital Ethical Committee |
| Saiseikai Kumamoto Hospital Cardiovascular Center | Hospital Ethical Committee |
| Saiseikai Shigaken Hospital | Hospital Ethical Committee |
| Sakurabashi Watanabe Hospital | Hospital Clinical Trial Ethical Committee |
| Sakura T's Clinic | Adachi Kyosai Hospital Ethical Committee* |
| Sato Pediatrics and Internal Clinic | Adachi Kyosai Hospital Ethical Committee* |
| Seirei Memorial Hospital | Adachi Kyosai Hospital Ethical Committee* |
| Seo Heart Clinic | Adachi Kyosai Hospital Ethical Committee* |
| Shimozono Clinic | Adachi Kyosai Hospital Ethical Committee* |
| Shindo Clinic | Adachi Kyosai Hospital Ethical Committee* |
| Shioda Hospital | Adachi Kyosai Hospital Ethical Committee* |
| Shin-Yamanote Hospital | Hospital Clinical Trial Ethical Committee |
| Showa University Hospital | University Hospital Ethical Committee |
| Sohma Hospital | Adachi Kyosai Hospital Ethical Committee* |
| St. Marianna University School of Medicine Hospital | Hospital Bioethical Committee |
| Sugishita Clinic | Adachi Kyosai Hospital Ethical Committee* |
| Sumi Cardiovascular Clinic | Adachi Kyosai Hospital Ethical Committee* |
| Tajiri Hospital | Adachi Kyosai Hospital Ethical Committee* |
| Takaishi Fujii Cardiovascular Hospital | Adachi Kyosai Hospital Ethical Committee* |
| Takano Clinic | Adachi Kyosai Hospital Ethical Committee* |
| Takase Clinic | Adachi Kyosai Hospital Ethical Committee* |
| Takashima Clinic | Adachi Kyosai Hospital Ethical Committee* |
| Tetsuo Clinic | Adachi Kyosai Hospital Ethical Committee* |
| Toho University Ohashi Hospital/Department of Cardiovascular Diseases | Toho University Hospital Ethical Committee |
| Tokyo Medical University Hospital | University Hospital Medical Ethical Committee |
| Tokyo Tenshi Hospital | Adachi Kyosai Hospital Ethical Committee* |
| Tokyo Women's Medical University | University Hospital Clinical Trial Ethical Committee |
| Toyohashi Heart Center | Hospital Ethical Committee |
| Tsumura Cardiovascular Clinic | Adachi Kyosai Hospital Ethical Committee* |
| Tsurugaya Hospital | Adachi Kyosai Hospital Ethical Committee* |
| Ubukata Heart Clinic | Adachi Kyosai Hospital Ethical Committee* |
| Uno Clinic | Adachi Kyosai Hospital Ethical Committee* |
| Urayasu Central Hospital | Adachi Kyosai Hospital Ethical Committee* |
| Yamamoto Clinic | Adachi Kyosai Hospital Ethical Committee* |
| Yamanashi Prefectural Central Hospital | Hospital Clinical Research Review Committee |
| Yamato Kashihara Hospital | Adachi Kyosai Hospital Ethical Committee* |
| Yokohama Sakae Kyosai Hospital | Hospital Clinical Trial Ethical Committee |
| Yokota Naika | Adachi Kyosai Hospital Ethical Committee* |
| Yoshida Naika Junkankika | Adachi Kyosai Hospital Ethical Committee* |

*Adachi Kyosai Hospital Ethical Committee was the central ethical committee for this study
